# Supplementary material for: 99mTc(CO)3-labeled pamidronate and alendronate for bone imaging
Source: Royal Society of Chemistry journal article supplement (doi:10.1039/c0dt01396j), 2011-01-01
Supplement: c0dt01396j.pdf [file c0dt01396j.pdf]

## Electronic Supplementary Information

### <sup>99m</sup>Tc(CO)<sub>3</sub>-Labeled Pamidronate and Alendronate for Bone Imaging\*

Elisa Palma, João D. G. Correia, Bruno L. Oliveira, Lurdes Gano, Isabel C. Santos, Isabel Santos<sup>†</sup>

Unidade de Ciências Químicas e Radiofarmacêuticas, ITN, Estrada Nacional 10, 2686-953 Sacavém,  
Portugal. e-mail: isantos@itn.pt

Submitted as a full article to Dalton Transactions

**Keywords:** Technetium-99m · Rhenium · Bisphosphonates · Bone imaging · Radiopharmaceuticals

---

\* CCDC reference number 789827.

<sup>†</sup> To whom correspondence should be addressed.

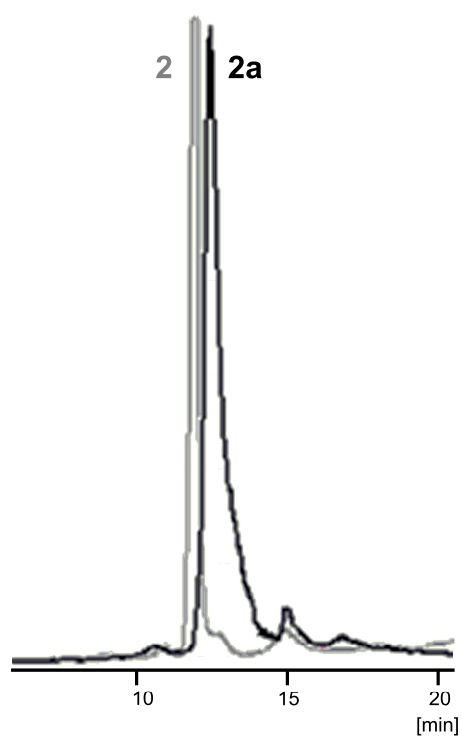

**Fig. S1.** RP-HPLC analytical chromatograms of **2** ( $t_R = 11.9$  min; UV/Vis-detection – 254 nm) and **2a** ( $t_R = 12.0$  min  $\gamma$ -detection).

**Table S1:** Crystallographic data of *fac*-[Re(CO)<sub>3</sub>(k<sup>3</sup>-p<sub>z</sub>-COOH)]<sup>+</sup>·CF<sub>3</sub>COO<sup>-</sup>·H<sub>2</sub>O.

|                                                 |                                                                                 |
|-------------------------------------------------|---------------------------------------------------------------------------------|
| Empirical formula                               | C <sub>18</sub> H <sub>26</sub> F <sub>3</sub> N <sub>4</sub> O <sub>8</sub> Re |
| M [g mol <sup>-1</sup> ]                        | 669.63                                                                          |
| Diffractometer                                  | Bruker-AXS APEX                                                                 |
| Wavelength                                      | 0.7107 Å                                                                        |
| Crystal system                                  | Monoclinic                                                                      |
| Space group                                     | <i>P</i> 2 <sub>1</sub> / <i>n</i>                                              |
| Unit cell dimensions                            | a = 68.7619(2) Å<br>b = 20.2966(5) Å<br>c = 39.1115(8) Å<br>β = 95.4290(10)°    |
| Volume [Å <sup>3</sup> ]                        | 6924.3(3)                                                                       |
| Z                                               | 12                                                                              |
| Density <sub>calcd.</sub> [Mg m <sup>-3</sup> ] | 1.927                                                                           |
| Absorption coefficient<br>[mm <sup>-1</sup> ]   | 5.341                                                                           |
| F(000)                                          | 3936                                                                            |
| Crystal size                                    | 0.24 x 0.08 x 0.03 mm <sup>3</sup>                                              |
| θ range                                         | 2.80 to 25.68°                                                                  |
| Index ranges                                    | -10 ≤ h ≤ 10,<br>-24 ≤ k ≤ 24,<br>-43 ≤ l ≤ 47                                  |
| Reflections collected                           | 53647                                                                           |
| Independent reflections                         | 13125 [R(int) = 0.0823]                                                         |
| Completeness to θ                               | 99.8 % (25.68°)                                                                 |
| Max. and min.<br>transmission                   | 0.8562 and 0.3605                                                               |
| Data / restraints /<br>parameters               | 13125 / 0 / 928                                                                 |
| Goodness-of-fit on F <sup>2</sup>               | 0.969                                                                           |
| Final R indices<br>[I > 2σ(I)]                  | R <sub>1</sub> = 0.0389,<br>wR <sub>2</sub> = 0.0680                            |
| R indices (all data)                            | R <sub>1</sub> = 0.0665,<br>wR <sub>2</sub> = 0.0738                            |
| Largest diff. peak and hole                     | 0.885 and -0.853 e. Å <sup>-3</sup>                                             |
